# Supplementary material for: Parent Involvement in Diet or Physical Activity Interventions to Treat or Prevent Childhood Obesity: An Umbrella Review
Source: MDPI journal article supplement (doi:10.3390/nu13093227), 2021-09-16
Supplement: s1 [file s1]

## Supplementary Table S1: Search Strategy

All searches were conducted in January 2020. Searches were customized for each database to include appropriate keywords and controlled vocabulary terms related to the topic of parental or caregiver involvement in interventions to control or treat childhood obesity. Filters designed to identify systematic reviews and meta-analyses were applied, as were English language filters.

### Ovid/MEDLINE

|    |                                                                                         |
|----|-----------------------------------------------------------------------------------------|
| 69 | limit 68 to (english and (meta analysis or systematic reviews))                         |
| 68 | 10 and 23 and 53 and 67                                                                 |
| 67 | or/54-66                                                                                |
| 66 | guardian*.ti,ab,kw.                                                                     |
| 65 | (care adj2 (giver* or provider*)).ti,ab,kw.                                             |
| 64 | carer*.ti,ab,kw.                                                                        |
| 63 | caregiver*.ti,ab,kw.                                                                    |
| 62 | "family based".ti,ab,kw.                                                                |
| 61 | father*.ti,ab,kw.                                                                       |
| 60 | mother*.ti,ab,kw.                                                                       |
| 59 | paternal.ti,ab,kw.                                                                      |
| 58 | maternal.ti,ab,kw.                                                                      |
| 57 | parent*.ti,ab,kw.                                                                       |
| 56 | exp Caregivers/                                                                         |
| 55 | exp PARENTING/                                                                          |
| 54 | exp PARENTS/                                                                            |
| 53 | 32 or 52                                                                                |
| 52 | or/33-51                                                                                |
| 51 | (Behavio?r adj2 chang*).ab,kw,ti.                                                       |
| 50 | (physical adj2 (activit* or fitness or training or conditioning or exertion)).ab,kw,ti. |
| 49 | "calori*".ab,kw,ti.                                                                     |
| 48 | "sedentar*".ab,kw,ti.                                                                   |
| 47 | "exercis*".ab,kw,ti.                                                                    |
| 46 | "snack*".ab,kw,ti.                                                                      |
| 45 | appetite.ab,kw,ti.                                                                      |
| 44 | "meal*".ab,kw,ti.                                                                       |
| 43 | "feeding*".ab,kw,ti.                                                                    |
| 42 | "food*".ab,kw,ti.                                                                       |
| 41 | intake.ab,kw,ti.                                                                        |
| 40 | eating.ab,kw,ti.                                                                        |
| 39 | nutritive.ab,kw,ti.                                                                     |
| 38 | nutrition.ab,kw,ti.                                                                     |
| 37 | "diet*".ab,kw,ti.                                                                       |
| 36 | "program*".ab,kw,ti.                                                                    |
| 35 | "intervention*".ab,kw,ti.                                                               |
| 34 | reduc*.ti,ab,kw.                                                                        |
| 33 | prevent*.ti,ab,kw.                                                                      |

|    |                                                                                                              |
|----|--------------------------------------------------------------------------------------------------------------|
| 32 | or/24-31                                                                                                     |
| 31 | exp Life Style/                                                                                              |
| 30 | exp Physical Fitness/                                                                                        |
| 29 | exp EXERCISE/                                                                                                |
| 28 | exp FOOD/ or exp FOOD PREFERENCES/                                                                           |
| 27 | exp "diet, food, and nutrition"/                                                                             |
| 26 | exp Risk Reduction Behavior/                                                                                 |
| 25 | exp Preventive Health Services/                                                                              |
| 24 | prevention & control.fs.                                                                                     |
| 23 | or/11-22                                                                                                     |
| 22 | ("out of school time" or "after school").ti,ab,kw.                                                           |
| 21 | (childcare or "child care").ti,ab,kw.                                                                        |
| 20 | preschool*.ti,ab,kw.                                                                                         |
| 19 | ((elementary or primary or grade or grammar or pre) adj2 school*).ti,ab,kw.                                  |
| 18 | (juvenile* or youth*).ti,ab,kw.                                                                              |
| 17 | p?ediatric*.ti,ab,kw.                                                                                        |
| 16 | (child* or girl* or boy*).ti,ab,kw.                                                                          |
| 15 | (adolescen* or pubert* or pubescen* or teen*).ti,ab,kw.                                                      |
| 14 | (preadolescen* or prepubert* or prepubescen* or preteen*).ti,ab,kw.                                          |
| 13 | (pre adj1 (adolescen* or pubert* or pubescen* or teen* or school*)).ti,ab,kw.                                |
| 12 | Pediatrics/                                                                                                  |
| 11 | exp CHILD/                                                                                                   |
| 10 | 1 or 2 or 3 or 4 or 5 or 6 or 7 or 8 or 9                                                                    |
| 9  | (weight adj2 (reduc* or loss or lose or lost or losing or gain* or increas* or chang* or related)).ti,ab,kw. |
| 8  | (bmi or "body mass").ti,ab,kw.                                                                               |
| 7  | (overnutrition or "over nutrition").ti,ab,kw.                                                                |
| 6  | adipos*.ti,ab,kw.                                                                                            |
| 5  | overweight.ti,ab,kw.                                                                                         |
| 4  | obes*.ti,ab,kw.                                                                                              |
| 3  | exp Child Nutrition Disorders/                                                                               |
| 2  | exp Body Mass Index/                                                                                         |
| 1  | exp OVERNUTRITION/                                                                                           |

## Cochrane Library

|     |                                                                    |
|-----|--------------------------------------------------------------------|
| D   | Search                                                             |
| #1  | Any MeSH descriptor with qualifier(s): [Prevention & control - PC] |
| #2  | [mh "Preventive Health Services"]                                  |
| #3  | [mh "Risk Reduction Behavior"]                                     |
| #4  | [mh "Diet, Food, and Nutrition"]                                   |
| #5  | [mh Food]                                                          |
| #6  | [mh "Food Preferences"]                                            |
| #7  | [mh Exercise]                                                      |
| #8  | [mh "Physical Fitness"]                                            |
| #9  | [mh "Life Style"]                                                  |
| #10 | {or #1-#9}                                                         |
| #11 | prevent*.ti,ab,kw                                                  |
| #12 | reduc*.ti,ab,kw                                                    |

|     |                                                                                                               |
|-----|---------------------------------------------------------------------------------------------------------------|
| #13 | intervention*:ti,ab,kw                                                                                        |
| #14 | program*:ti,ab,kw                                                                                             |
| #15 | diet*:ti,ab,kw                                                                                                |
| #16 | nutrition*:ti,ab,kw                                                                                           |
| #17 | nutritive:ti,ab,kw                                                                                            |
| #18 | eating:ti,ab,kw                                                                                               |
| #19 | intake:ti,ab,kw                                                                                               |
| #20 | food*:ti,ab,kw                                                                                                |
| #21 | feeding:ti,ab,kw                                                                                              |
| #22 | meal*:ti,ab,kw                                                                                                |
| #23 | appetite*:ti,ab,kw                                                                                            |
| #24 | snack*:ti,ab,kw                                                                                               |
| #25 | exercis*:ti,ab,kw                                                                                             |
| #26 | sedentar*:ti,ab,kw                                                                                            |
| #27 | calori*:ti,ab,kw                                                                                              |
| #28 | physical near/2 (activit* or fitness or training or conditioning or exertion):ti,ab,kw                        |
| #29 | Behavio?r near/2 chang*:ti,ab,kw                                                                              |
| #30 | {or #11-#29}                                                                                                  |
| #31 | #10 or #30                                                                                                    |
| #32 | pre next (adolescen* or pubert* or pubescen* or teen* or school*):ti,ab,kw                                    |
| #33 | (adolescen* or pubert* or pubescen* or teen*):ti,ab,kw                                                        |
| #34 | (preadolescen* or prepubert* or prepubescen* or preteen*):ti,ab,kw                                            |
| #35 | child*:ti,ab,kw                                                                                               |
| #36 | girl*:ti,ab,kw                                                                                                |
| #37 | boy*:ti,ab,kw                                                                                                 |
| #38 | (paediatric* or pediatric*):ti,ab,kw                                                                          |
| #39 | youth*:ti,ab,kw                                                                                               |
| #40 | juvenile*:ti,ab,kw                                                                                            |
| #41 | ((elementary or primary or grade or grammar or pre) near/2 school*):ti,ab,kw                                  |
| #42 | preschool:ti,ab,kw                                                                                            |
| #43 | "after school":ti,ab,kw                                                                                       |
| #44 | "out of school time":ti,ab,kw                                                                                 |
| #45 | childcare:ti,ab,kw                                                                                            |
| #46 | "child care":ti,ab,kw                                                                                         |
| #47 | MeSH descriptor: [Pediatrics] explode all trees                                                               |
| #48 | MeSH descriptor: [Child] explode all trees                                                                    |
| #49 | {or #32-#48}                                                                                                  |
| #50 | MeSH descriptor: [Overnutrition] explode all trees                                                            |
| #51 | MeSH descriptor: [Child Nutrition Disorders] explode all trees                                                |
| #52 | MeSH descriptor: [Body Mass Index] explode all trees                                                          |
| #53 | obes*:ti,ab,kw                                                                                                |
| #54 | overweight:ti,ab,kw                                                                                           |
| #55 | "over weight":ti,ab,kw                                                                                        |
| #56 | (weight near/2 (reduc* or loss or lose or lost or losing or gain* or increas* or chang* or related)):ti,ab,kw |
| #57 | adipos*:ti,ab,kw                                                                                              |
| #58 | overnutrition:ti,ab,kw                                                                                        |
| #59 | "over nutrition":ti,ab,kw                                                                                     |
| #60 | BMI*:ti,ab,kw                                                                                                 |

|     |                                                 |
|-----|-------------------------------------------------|
| #61 | "body mass":ti,ab,kw                            |
| #62 | {or #50-#61}                                    |
| #63 | MeSH descriptor: [Parents] explode all trees    |
| #64 | MeSH descriptor: [Parenting] explode all trees  |
| #65 | MeSH descriptor: [Caregivers] explode all trees |
| #66 | parent*:ti,ab,kw                                |
| #67 | maternal:ti,ab,kw                               |
| #68 | paternal:ti,ab,kw                               |
| #69 | mother*:ti,ab,kw                                |
| #70 | father*:ti,ab,kw                                |
| #71 | "family based":ti,ab,kw                         |
| #72 | caregiver*:ti,ab,kw                             |
| #73 | carer*:ti,ab,kw                                 |
| #74 | (care near/2 (giver* or provider*)):ti,ab,kw    |
| #75 | guardian*:ti,ab,kw                              |
| #76 | {or #63-#75}                                    |
| #77 | #31 and #49 and #62 and #76                     |
| #78 | #31 and #49 and #62 and #76 in Other Reviews    |

## Embase

| No. | Query                                                                                                               |
|-----|---------------------------------------------------------------------------------------------------------------------|
| #75 | #15 AND #28 AND #59 AND #72 AND [english]/lim AND ([cochrane review]/lim OR [sy review]/lim OR [meta analysis]/lim) |
| #74 | #15 AND #28 AND #59 AND #72 AND [english]/lim                                                                       |
| #73 | #15 AND #28 AND #59 AND #72                                                                                         |
| #72 | #60 OR #61 OR #62 OR #63 OR #64 OR #65 OR #66 OR #67 OR #68 OR #69 OR #70 OR #71                                    |
| #71 | guardian*:ti,ab                                                                                                     |
| #70 | (care NEAR/2 (giver* OR provider*)):ti,ab                                                                           |
| #69 | carer*:ti,ab                                                                                                        |
| #68 | caregiver*:ti,ab                                                                                                    |
| #67 | "family based":ti,ab                                                                                                |
| #66 | father*:ti,ab                                                                                                       |
| #65 | mother*:ti,ab                                                                                                       |

| No. | Query                                                                                                                             |
|-----|-----------------------------------------------------------------------------------------------------------------------------------|
| #64 | paternal:ti,ab                                                                                                                    |
| #63 | maternal:ti,ab                                                                                                                    |
| #62 | parent*:ti,ab,kw                                                                                                                  |
| #61 | 'caregiver'/exp                                                                                                                   |
| #60 | 'parent'/exp                                                                                                                      |
| #59 | #38 OR #58                                                                                                                        |
| #58 | #39 OR #40 OR #41 OR #42 OR #43 OR #44 OR #45 OR #46 OR #47 OR #48 OR #49 OR #50 OR #51 OR #52 OR #53 OR #54 OR #55 OR #56 OR #57 |
| #57 | ((behavior OR behaviour) NEAR/2 chang*):ti,ab                                                                                     |
| #56 | (physical NEAR/2 (activit* OR fitness OR training OR conditioning OR exertion)):ti,ab                                             |
| #55 | calori*:ti,ab                                                                                                                     |
| #54 | sedentar*:ti,ab                                                                                                                   |
| #53 | exercis*:ti,ab                                                                                                                    |
| #52 | snack*:ti,ab                                                                                                                      |
| #51 | appetite*:ti,ab                                                                                                                   |
| #50 | meal*:ti,ab                                                                                                                       |
| #49 | feeding*:ti,ab                                                                                                                    |
| #48 | food*:ti,ab                                                                                                                       |
| #47 | intake:ti,ab                                                                                                                      |
| #46 | eating:ti,ab                                                                                                                      |
| #45 | nutritive:ti,ab                                                                                                                   |
| #44 | nutrition*:ti,ab                                                                                                                  |

| No. | Query                                                                                                   |
|-----|---------------------------------------------------------------------------------------------------------|
| #43 | diet*:ti,ab                                                                                             |
| #42 | intervention*:ti,ab                                                                                     |
| #41 | program*:ti,ab                                                                                          |
| #40 | reduc*:ti,ab                                                                                            |
| #39 | prevent*:ti,ab                                                                                          |
| #38 | #29 OR #30 OR #31 OR #32 OR #33 OR #34 OR #35 OR #36 OR #37                                             |
| #37 | 'behavior change'/exp                                                                                   |
| #36 | 'lifestyle modification'/exp                                                                            |
| #35 | 'physical activity, capacity and performance'/exp                                                       |
| #34 | 'food'/exp                                                                                              |
| #33 | 'feeding'/exp                                                                                           |
| #32 | 'nutrition'/exp                                                                                         |
| #31 | 'body weight management'/exp                                                                            |
| #30 | 'risk reduction'/exp                                                                                    |
| #29 | 'prevention'/exp                                                                                        |
| #28 | #16 OR #17 OR #18 OR #19 OR #20 OR #21 OR #22 OR #23 OR #24 OR #25 OR #26 OR #27                        |
| #27 | childcare:ti,ab,kw OR 'child care':ti,ab,kw OR 'out of school time':ti,ab,kw OR 'after school':ti,ab,kw |
| #26 | ((elementary OR primary OR grade OR grammar OR pre) NEAR/2 school*):ti,ab,kw                            |
| #25 | youth*:ti,ab,kw OR juvenile*:ti,ab,kw                                                                   |
| #24 | paediatric*:ti,ab,kw OR pediatric*:ti,ab,kw                                                             |
| #23 | child*:ti,ab,kw OR girl*:ti,ab,kw OR boy*:ti,ab,kw                                                      |

| No. | Query                                                                                                               |
|-----|---------------------------------------------------------------------------------------------------------------------|
| #22 | preadolescen*:ti,ab,kw OR prepubert*:ti,ab,kw OR prepubescen*:ti,ab,kw OR preteen*:ti,ab,kw OR prerschool*:ti,ab,kw |
| #21 | ('pre' NEXT/1 (adolescen* OR pubert* OR pubescen* OR teen* OR school*)):ti,ab,kw                                    |
| #20 | adolescen*:ti,ab,kw OR pubert*:ti,ab,kw OR pubescen*:ti,ab,kw OR teen*:ti,ab,kw                                     |
| #19 | 'pediatrics'/exp                                                                                                    |
| #18 | 'childhood'/exp                                                                                                     |
| #17 | 'child'/exp                                                                                                         |
| #16 | 'child care'/exp                                                                                                    |
| #15 | #5 OR #14                                                                                                           |
| #14 | #6 OR #7 OR #8 OR #9 OR #10 OR #11 OR #12 OR #13                                                                    |
| #13 | overweight:ti,ab,kw OR 'over weight':ti,ab,kw                                                                       |
| #12 | (weight NEAR/2 (reduc* OR loss OR lose OR lost OR losing OR gain* OR increas* OR chang* OR related)):ti,ab,kw       |
| #11 | 'body mass':ti,ab,kw                                                                                                |
| #10 | bmi*:ti,ab,kw                                                                                                       |
| #9  | 'over nutrition':ti,ab,kw                                                                                           |
| #8  | overnutrition:ti,ab,kw                                                                                              |
| #7  | adipos*:ti,ab,kw                                                                                                    |
| #6  | obes*:ti,ab,kw                                                                                                      |
| #5  | #1 OR #2 OR #3 OR #4                                                                                                |
| #4  | 'body weight management'/exp                                                                                        |
| #3  | 'body weight loss'/exp                                                                                              |
| #2  | 'overnutrition'/exp                                                                                                 |

| No. | Query           |
|-----|-----------------|
| #1  | 'body mass'/exp |

## Web of Science

|      |                                                                                                                                                                                                                                                                                     |
|------|-------------------------------------------------------------------------------------------------------------------------------------------------------------------------------------------------------------------------------------------------------------------------------------|
|      |                                                                                                                                                                                                                                                                                     |
| # 34 | #31 AND #28<br><b>Refined by: LANGUAGES:</b> ( ENGLISH ) AND [excluding] <b>DOCUMENT TYPES:</b> ( BOOK CHAPTER OR MEETING ABSTRACT OR EDITORIAL MATERIAL )<br><i>Indexes=SCI-EXPANDED, SSCI, A&amp;HCI, CPCI-S, CPCI-SSH, BKCI-S, BKCI-SSH, CCR-EXPANDED, IC Timespan=1900-2018</i> |
| # 33 | #31 AND #28<br><b>Refined by: LANGUAGES:</b> ( ENGLISH )<br><i>Indexes=SCI-EXPANDED, SSCI, A&amp;HCI, CPCI-S, CPCI-SSH, BKCI-S, BKCI-SSH, CCR-EXPANDED, IC Timespan=1900-2018</i>                                                                                                   |
| # 32 | #31 AND #28<br><i>Indexes=SCI-EXPANDED, SSCI, A&amp;HCI, CPCI-S, CPCI-SSH, BKCI-S, BKCI-SSH, CCR-EXPANDED, IC Timespan=1900-2018</i>                                                                                                                                                |
| # 31 | #30 OR #29<br><i>Indexes=SCI-EXPANDED, SSCI, A&amp;HCI, CPCI-S, CPCI-SSH, BKCI-S, BKCI-SSH, CCR-EXPANDED, IC Timespan=1900-2018</i>                                                                                                                                                 |
| # 30 | TS=(systematic NEAR/3 review*)<br><i>Indexes=SCI-EXPANDED, SSCI, A&amp;HCI, CPCI-S, CPCI-SSH, BKCI-S, BKCI-SSH, CCR-EXPANDED, IC Timespan=1900-2018</i>                                                                                                                             |
| # 29 | TS=(metaanalys* OR meta-analys* OR "meta analys*")<br><i>Indexes=SCI-EXPANDED, SSCI, A&amp;HCI, CPCI-S, CPCI-SSH, BKCI-S, BKCI-SSH, CCR-EXPANDED, IC Timespan=1900-2018</i>                                                                                                         |
| # 28 | #27 AND #26 AND #25 AND #24<br><i>Indexes=SCI-EXPANDED, SSCI, A&amp;HCI, CPCI-S, CPCI-SSH, BKCI-S, BKCI-SSH, CCR-EXPANDED, IC Timespan=1900-2018</i>                                                                                                                                |
| # 27 | #23 OR #22 OR #21 OR #20                                                                                                                                                                                                                                                            |



|      |                                                                                                                                                                                                                                        |
|------|----------------------------------------------------------------------------------------------------------------------------------------------------------------------------------------------------------------------------------------|
|      | <i>Indexes=SCI-EXPANDED, SSCI, A&amp;HCI, CPCI-S, CPCI-SSH, BKCI-S, BKCI-SSH, CCR-EXPANDED, IC Timespan=1900-2018</i>                                                                                                                  |
| # 26 | #19 OR #18 OR #17 OR #16 OR #15<br><i>Indexes=SCI-EXPANDED, SSCI, A&amp;HCI, CPCI-S, CPCI-SSH, BKCI-S, BKCI-SSH, CCR-EXPANDED, IC Timespan=1900-2018</i>                                                                               |
| # 25 | #14 OR #13 OR #12 OR #11 OR #10 OR #9 OR #8 OR #7<br><i>Indexes=SCI-EXPANDED, SSCI, A&amp;HCI, CPCI-S, CPCI-SSH, BKCI-S, BKCI-SSH, CCR-EXPANDED, IC Timespan=1900-2018</i>                                                             |
| # 24 | #6 OR #5 OR #4 OR #3 OR #2 OR #1<br><i>Indexes=SCI-EXPANDED, SSCI, A&amp;HCI, CPCI-S, CPCI-SSH, BKCI-S, BKCI-SSH, CCR-EXPANDED, IC Timespan=1900-2018</i>                                                                              |
| # 23 | TS=((behavior OR behaviour) NEAR/2 chang*)<br><i>Indexes=SCI-EXPANDED, SSCI, A&amp;HCI, CPCI-S, CPCI-SSH, BKCI-S, BKCI-SSH, CCR-EXPANDED, IC Timespan=1900-2018</i>                                                                    |
| # 22 | TS=(physical NEAR/2 (activit* or fitness or training or conditioning or exertion))<br><i>Indexes=SCI-EXPANDED, SSCI, A&amp;HCI, CPCI-S, CPCI-SSH, BKCI-S, BKCI-SSH, CCR-EXPANDED, IC Timespan=1900-2018</i>                            |
| # 21 | TS=(eating OR intake OR food* OR feeding OR meal* OR appetite OR snack* OR exercise* OR sedentar* OR kalori*)<br><i>Indexes=SCI-EXPANDED, SSCI, A&amp;HCI, CPCI-S, CPCI-SSH, BKCI-S, BKCI-SSH, CCR-EXPANDED, IC Timespan=1900-2018</i> |
| # 20 | TS=(prevent* OR reduc* OR intervention* OR program* OR diet* OR nutrition* OR nutritive)<br><i>Indexes=SCI-EXPANDED, SSCI, A&amp;HCI, CPCI-S, CPCI-SSH, BKCI-S, BKCI-SSH, CCR-EXPANDED, IC Timespan=1900-2018</i>                      |
| # 19 | TS=(care NEAR/2 (giver* OR provider*))<br><i>Indexes=SCI-EXPANDED, SSCI, A&amp;HCI, CPCI-S, CPCI-SSH, BKCI-S, BKCI-SSH, CCR-EXPANDED, IC Timespan=1900-2018</i>                                                                        |
| # 18 | TS=(caregiver* OR carer*)<br><i>Indexes=SCI-EXPANDED, SSCI, A&amp;HCI, CPCI-S, CPCI-SSH, BKCI-S, BKCI-SSH, CCR-EXPANDED, IC Timespan=1900-2018</i>                                                                                     |
| # 17 | TS="family based"                                                                                                                                                                                                                      |

|      |                                                                                                                                                                                                     |
|------|-----------------------------------------------------------------------------------------------------------------------------------------------------------------------------------------------------|
|      | <i>Indexes=SCI-EXPANDED, SSCI, A&amp;HCI, CPCI-S, CPCI-SSH, BKCI-S, BKCI-SSH, CCR-EXPANDED, IC Timespan=1900-2018</i>                                                                               |
| # 16 | TS=(maternal OR paternal)<br><i>Indexes=SCI-EXPANDED, SSCI, A&amp;HCI, CPCI-S, CPCI-SSH, BKCI-S, BKCI-SSH, CCR-EXPANDED, IC Timespan=1900-2018</i>                                                  |
| # 15 | TS=(parent* OR mother* OR father* OR guardian*)<br><i>Indexes=SCI-EXPANDED, SSCI, A&amp;HCI, CPCI-S, CPCI-SSH, BKCI-S, BKCI-SSH, CCR-EXPANDED, IC Timespan=1900-2018</i>                            |
| # 14 | TS=(childcare or "child care")<br><i>Indexes=SCI-EXPANDED, SSCI, A&amp;HCI, CPCI-S, CPCI-SSH, BKCI-S, BKCI-SSH, CCR-EXPANDED, IC Timespan=1900-2018</i>                                             |
| # 13 | TS=("after school" OR "out of school time")<br><i>Indexes=SCI-EXPANDED, SSCI, A&amp;HCI, CPCI-S, CPCI-SSH, BKCI-S, BKCI-SSH, CCR-EXPANDED, IC Timespan=1900-2018</i>                                |
| # 12 | TS=((elementary OR primary OR grade OR grammar OR pre) NEAR/2 (school*))<br><i>Indexes=SCI-EXPANDED, SSCI, A&amp;HCI, CPCI-S, CPCI-SSH, BKCI-S, BKCI-SSH, CCR-EXPANDED, IC Timespan=1900-2018</i>   |
| # 11 | TS=(youth* OR juvenile*)<br><i>Indexes=SCI-EXPANDED, SSCI, A&amp;HCI, CPCI-S, CPCI-SSH, BKCI-S, BKCI-SSH, CCR-EXPANDED, IC Timespan=1900-2018</i>                                                   |
| # 10 | TS=(pediatric* OR paediatric*)<br><i>Indexes=SCI-EXPANDED, SSCI, A&amp;HCI, CPCI-S, CPCI-SSH, BKCI-S, BKCI-SSH, CCR-EXPANDED, IC Timespan=1900-2018</i>                                             |
| # 9  | TS=(child* OR boy* OR girl*)<br><i>Indexes=SCI-EXPANDED, SSCI, A&amp;HCI, CPCI-S, CPCI-SSH, BKCI-S, BKCI-SSH, CCR-EXPANDED, IC Timespan=1900-2018</i>                                               |
| # 8  | TS=((pre) NEAR/1 (adolescen* OR pubert* OR pubescen* OR teen* OR school*))<br><i>Indexes=SCI-EXPANDED, SSCI, A&amp;HCI, CPCI-S, CPCI-SSH, BKCI-S, BKCI-SSH, CCR-EXPANDED, IC Timespan=1900-2018</i> |
| # 7  | TS=(preadolescen* OR prepubert* OR prepubescen* OR preteen* OR preschool* OR adolescen* OR pubert* OR pubescen* OR teen*)                                                                           |

|     |                                                                                                                                                                                                                                     |
|-----|-------------------------------------------------------------------------------------------------------------------------------------------------------------------------------------------------------------------------------------|
|     | <i>Indexes=SCI-EXPANDED, SSCI, A&amp;HCI, CPCI-S, CPCI-SSH, BKCI-S, BKCI-SSH, CCR-EXPANDED, IC Timespan=1900-2018</i>                                                                                                               |
| # 6 | TS=("body mass" OR BMI)<br><i>Indexes=SCI-EXPANDED, SSCI, A&amp;HCI, CPCI-S, CPCI-SSH, BKCI-S, BKCI-SSH, CCR-EXPANDED, IC Timespan=1900-2018</i>                                                                                    |
| # 5 | TS=(overnutrition OR "over nutrition")<br><i>Indexes=SCI-EXPANDED, SSCI, A&amp;HCI, CPCI-S, CPCI-SSH, BKCI-S, BKCI-SSH, CCR-EXPANDED, IC Timespan=1900-2018</i>                                                                     |
| # 4 | TS= ((weight) NEAR/2 (reduc* OR loss OR lose OR lost OR losing OR gain* OR increas* OR chang* OR related))<br><i>Indexes=SCI-EXPANDED, SSCI, A&amp;HCI, CPCI-S, CPCI-SSH, BKCI-S, BKCI-SSH, CCR-EXPANDED, IC Timespan=1900-2018</i> |
| # 3 | TS=adipos*<br><i>Indexes=SCI-EXPANDED, SSCI, A&amp;HCI, CPCI-S, CPCI-SSH, BKCI-S, BKCI-SSH, CCR-EXPANDED, IC Timespan=1900-2018</i>                                                                                                 |
| # 2 | TS=(overweight OR "over weight")<br><i>Indexes=SCI-EXPANDED, SSCI, A&amp;HCI, CPCI-S, CPCI-SSH, BKCI-S, BKCI-SSH, CCR-EXPANDED, IC Timespan=1900-2018</i>                                                                           |
| # 1 | TS=obes*<br><i>Indexes=SCI-EXPANDED, SSCI, A&amp;HCI, CPCI-S, CPCI-SSH, BKCI-S, BKCI-SSH, CCR-EXPANDED, IC Timespan=1900-2018</i>                                                                                                   |

## CINAHL

| #   | Query                                                                                                                        |
|-----|------------------------------------------------------------------------------------------------------------------------------|
| S69 | S28 AND S43 AND S54 AND S67 Limiters - Publication Type: Meta Analysis, Meta Synthesis, Systematic Review; Language: English |
| S68 | S28 AND S43 AND S54 AND S67                                                                                                  |
| S67 | S55 OR S56 OR S57 OR S58 OR S59 OR S60 OR S61 OR S62 OR S63 OR S64 OR S65 OR S66                                             |
| S66 | guardian*                                                                                                                    |
| S65 | care N2 (giver* OR provider*)                                                                                                |
| S64 | carer*                                                                                                                       |
| S63 | caregiver*                                                                                                                   |
| S62 | "family based"                                                                                                               |
| S61 | father*                                                                                                                      |
| S60 | mother*                                                                                                                      |
| S59 | paternal                                                                                                                     |

|     |                                                                                                                                 |
|-----|---------------------------------------------------------------------------------------------------------------------------------|
| S58 | maternal                                                                                                                        |
| S57 | parent*                                                                                                                         |
| S56 | (MH "Caregivers")                                                                                                               |
| S55 | (MH "Parents+")                                                                                                                 |
| S54 | S44 OR S45 OR S46 OR S47 OR S48 OR S49 OR S50 OR S51 OR S52 OR S53                                                              |
| S53 | "body mass"                                                                                                                     |
| S52 | bmi*                                                                                                                            |
| S51 | "over nutrition"                                                                                                                |
| S50 | overnutrition                                                                                                                   |
| S49 | adipos*                                                                                                                         |
| S48 | (weight N2 (reduc* OR loss OR lose OR lost OR losing OR gain* OR increas* OR chang* OR related)                                 |
| S47 | overweight                                                                                                                      |
| S46 | obes*                                                                                                                           |
| S45 | (MH "Obesity+")                                                                                                                 |
| S44 | (MH "Body Mass Index")                                                                                                          |
| S43 | S29 OR S30 OR S31 OR S32 OR S33 OR S34 OR S35 OR S36 OR S37 OR S38 OR S39 OR S40 OR S41 OR S42                                  |
| S42 | (MH "Pediatric Care+")                                                                                                          |
| S41 | (MH "Child+")                                                                                                                   |
| S40 | (MH "Pediatrics+")                                                                                                              |
| S39 | "out of school time"                                                                                                            |
| S38 | ("after school") OR childcare OR "child care"                                                                                   |
| S37 | (elementary OR primary OR grade OR grammar OR pre) N2 school*                                                                   |
| S36 | youth* OR juvenile*                                                                                                             |
| S35 | preschool*                                                                                                                      |
| S34 | pediatric* OR paediatric*                                                                                                       |
| S33 | boy*                                                                                                                            |
| S32 | girl*                                                                                                                           |
| S31 | child*                                                                                                                          |
| S30 | (adolescen* OR pubert* OR pubescen* OR teen*) OR (preadolescen* OR prepubert* OR prepubescen* OR preteen*)                      |
| S29 | 'pre' W1(adolescen* OR pubert* OR pubescen* OR teen* OR school*)                                                                |
| S28 | S7 OR S27                                                                                                                       |
| S27 | S8 OR S9 OR S10 OR S11 OR S12 OR S13 OR S14 OR S15 OR S16 OR S17 OR S18 OR S19 OR S20 OR S21 OR S22 OR S23 OR S24 OR S25 OR S26 |
| S26 | (behavior* OR behaviour*) N2 chang*                                                                                             |
| S25 | physical N2 (activit* or fitness or training or conditioning or exertion)                                                       |
| S24 | calori*                                                                                                                         |
| S23 | sedentar*                                                                                                                       |
| S22 | exercis*                                                                                                                        |
| S21 | snack*                                                                                                                          |
| S20 | appetite*                                                                                                                       |
| S19 | meal*                                                                                                                           |
| S18 | feeding                                                                                                                         |
| S17 | food*                                                                                                                           |
| S16 | intake                                                                                                                          |
| S15 | eating                                                                                                                          |
| S14 | nutritive                                                                                                                       |

|     |                                              |
|-----|----------------------------------------------|
| S13 | nutrition*                                   |
| S12 | diet*                                        |
| S11 | program*                                     |
| S10 | intervention*                                |
| S9  | reduc*                                       |
| S8  | prevent*                                     |
| S7  | (S1 OR S2 OR S3 OR S4 OR S5 OR S6)           |
| S6  | (MH "Life Style+")                           |
| S5  | (MH "Exercise+") OR (MH "Physical Fitness+") |
| S4  | (MH "Food Preferences")                      |
| S3  | (MH "Food+")                                 |
| S2  | (MH "Diet+")                                 |
| S1  | (MH "Preventive Health Care+")               |

## PsycInfo

| #   | Query                                                                                                                                     |
|-----|-------------------------------------------------------------------------------------------------------------------------------------------|
| S60 | S21 AND S34 AND S45 AND S58 Limiters - Language: English; Methodology: - Systematic Review, META ANALYSIS, METASYNTHESIS                  |
| S59 | S21 AND S34 AND S45 AND S58                                                                                                               |
| S58 | S46 OR S47 OR S48 OR S49 OR S50 OR S51 OR S52 OR S53 OR S54 OR S55 OR S56 OR S57                                                          |
| S57 | guardian*                                                                                                                                 |
| S56 | care N2 (giver* OR provider*)                                                                                                             |
| S55 | carer*                                                                                                                                    |
| S54 | caregiver*                                                                                                                                |
| S53 | "family based"                                                                                                                            |
| S52 | father*                                                                                                                                   |
| S51 | mother*                                                                                                                                   |
| S50 | paternal                                                                                                                                  |
| S49 | maternal                                                                                                                                  |
| S48 | parent*                                                                                                                                   |
| S47 | DE "Caregivers"                                                                                                                           |
| S46 | (DE "Parents" OR DE "Adoptive Parents" OR DE "Fathers" OR DE "Foster Parents" OR DE "Mothers" OR DE "Single Parents" OR DE "Stepparents") |
| S45 | S35 OR S36 OR S37 OR S38 OR S39 OR S40 OR S41 OR S42 OR S43 OR S44                                                                        |
| S44 | "body mass"                                                                                                                               |
| S43 | bmi*                                                                                                                                      |
| S42 | "over nutrition"                                                                                                                          |
| S41 | overnutrition                                                                                                                             |
| S40 | adipos*                                                                                                                                   |
| S39 | weight N2 (reduc* OR loss OR lose OR lost OR losing OR gain* OR increas* OR chang* OR related)                                            |
| S38 | "over weight"                                                                                                                             |
| S37 | overweight                                                                                                                                |
| S36 | obes*                                                                                                                                     |
| S35 | DE "Overweight" OR DE "Obesity" OR DE "Body Mass Index"                                                                                   |

|     |                                                                                                                                   |
|-----|-----------------------------------------------------------------------------------------------------------------------------------|
| S34 | S22 OR S23 OR S24 OR S25 OR S26 OR S27 OR S28 OR S29 OR S30 OR S31 OR S32 OR S33                                                  |
| S33 | DE "Pediatrics"                                                                                                                   |
| S32 | "out of school time"                                                                                                              |
| S31 | "after school" OR childcare OR "child care"                                                                                       |
| S30 | (elementary OR primary OR grade OR grammar OR pre) N2 school*                                                                     |
| S29 | youth* OR juvenile*                                                                                                               |
| S28 | preschool*                                                                                                                        |
| S27 | pediatric* OR paediatric*                                                                                                         |
| S26 | boy*                                                                                                                              |
| S25 | girl*                                                                                                                             |
| S24 | child*                                                                                                                            |
| S23 | (adolescen* OR pubert* OR pubescen* OR teen*) OR (preadolescen* OR prepubert* OR prepubescen* OR preteen*)                        |
| S22 | 'pre' W1(adolescen* OR pubert* OR pubescen* OR teen* OR school*)                                                                  |
| S21 | (S1 OR S2 OR S3 OR S4 OR S5 OR S6 OR S7 OR S8 OR S9 OR S10 OR S11 OR S12 OR S13 OR S14 OR S15 OR S16 OR S17 OR S18 OR S19 OR S20) |
| S20 | (behavior* OR behaviour*) N2 chang*                                                                                               |
| S19 | physical N2 (activit* or fitness or training or conditioning or exertion)                                                         |
| S18 | calori*                                                                                                                           |
| S17 | sedentar*                                                                                                                         |
| S16 | exercis*                                                                                                                          |
| S15 | snack*                                                                                                                            |
| S14 | appetite*                                                                                                                         |
| S13 | meal*                                                                                                                             |
| S12 | feeding                                                                                                                           |
| S11 | food*                                                                                                                             |
| S10 | intake                                                                                                                            |
| S9  | eating                                                                                                                            |
| S8  | nutritive                                                                                                                         |
| S7  | nutrition*                                                                                                                        |
| S6  | diet*                                                                                                                             |
| S5  | program*                                                                                                                          |
| S4  | intervention*                                                                                                                     |
| S3  | reduc*                                                                                                                            |
| S2  | prevent*                                                                                                                          |
| S1  | DE "Prevention" OR DE "Early Intervention"                                                                                        |

## Epistemonikos.org

(title:((title:(obes\* OR overweight OR "overweight" OR adipos\* OR weight OR overnutrition OR "over nutrition" OR BMI OR "body mass")) OR abstract:(obes\* OR overweight OR "overweight" OR adipos\* OR weight OR overnutrition OR "over nutrition" OR BMI OR "body mass"))) AND (title:(preadolescen\* OR prepubert\* OR prepubescen\* OR preteen\* OR preschool\* OR pre-adolescen\* OR pre-pubert\* OR pre-pubescen\* OR preteen\* OR pre-school\* OR adolescen\* OR pubert\* OR pubescen\* OR teen\* OR child\* OR girl\* OR boy\* OR pediatric\* OR paediatric\* OR youth\* OR juvenile\* OR "elementary school" OR "primary school" OR "grade school" OR "grammar school" OR "after school" OR "out of school time" OR childcare OR "child care" OR

child-care) OR abstract:(preadolescen\* OR prepubert\* OR prepubescen\* OR preteen\* OR  
 preschool\* OR pre-adolescen\* OR pre-pubert\* OR pre-pubescen\* OR preteen\* OR pre-school\* OR  
 adolescen\* OR pubert\* OR pubescen\* OR teen\* OR child\* OR girl\* OR boy\* OR pediatric\* OR  
 paediatric\* OR youth\* OR juvenile\* OR "elementary school" OR "primary school" OR "grade  
 school" OR "grammar school" OR "after school" OR "out of school time" OR childcare OR "child  
 care" OR child-care)) AND (title:(prevent\* OR reduc\* OR intervention\* OR program\* OR diet\* OR  
 nutrition\* OR nutritive OR eating OR intake OR food\* OR feeding OR meal\* OR appetite OR  
 snack\* OR exercise\* OR sedentar\* OR kalori\* OR "physical activity" OR "physical activities" OR  
 "physical fitness" OR "physical training" OR "physical conditioning" OR "physical exertion" OR  
 "behavior change" OR "behavior changes" OR "behaviour change" OR "behaviour changes") OR  
 abstract:(prevent\* OR reduc\* OR intervention\* OR program\* OR diet\* OR nutrition\* OR nutritive  
 OR eating OR intake OR food\* OR feeding OR meal\* OR appetite OR snack\* OR exercise\* OR  
 sedentar\* OR kalori\* OR "physical activity" OR "physical activities" OR "physical fitness" OR  
 "physical training" OR "physical conditioning" OR "physical exertion" OR "behavior change" OR  
 "behavior changes" OR "behaviour change" OR "behaviour changes")) AND (title:(parent\* OR  
 maternal OR paternal OR mother\* OR father\* OR "family based" OR caregiver\* OR "care giver"  
 OR "care givers" OR carer\* OR "care provider" OR "care providers" OR guardian\*) OR  
 abstract:(parent\* OR maternal OR paternal OR mother\* OR father\* OR "family based" OR  
 caregiver OR "care giver" OR "care givers\*" OR carer\* OR "care provider" OR "care providers" OR  
 guardian\*)) OR abstract:((title:(obes\* OR overweight OR "overweight" OR adipos\* OR weight OR  
 overnutrition OR "over nutrition" OR BMI OR "body mass") OR abstract:(obes\* OR overweight OR  
 "overweight" OR adipos\* OR weight OR overnutrition OR "over nutrition" OR BMI OR "body  
 mass")) AND (title:(preadolescen\* OR prepubert\* OR prepubescen\* OR preteen\* OR preschool\*  
 OR pre-adolescen\* OR pre-pubert\* OR pre-pubescen\* OR preteen\* OR pre-school\* OR adolescen\*  
 OR pubert\* OR pubescen\* OR teen\* OR child\* OR girl\* OR boy\* OR pediatric\* OR paediatric\*  
 OR youth\* OR juvenile\* OR "elementary school" OR "primary school" OR "grade school" OR  
 "grammar school" OR "after school" OR "out of school time" OR childcare OR "child care" OR  
 child-care) OR abstract:(preadolescen\* OR prepubert\* OR prepubescen\* OR preteen\* OR  
 preschool\* OR pre-adolescen\* OR pre-pubert\* OR pre-pubescen\* OR preteen\* OR pre-school\* OR  
 adolescen\* OR pubert\* OR pubescen\* OR teen\* OR child\* OR girl\* OR boy\* OR pediatric\* OR  
 paediatric\* OR youth\* OR juvenile\* OR "elementary school" OR "primary school" OR "grade  
 school" OR "grammar school" OR "after school" OR "out of school time" OR childcare OR "child  
 care" OR child-care)) AND (title:(prevent\* OR reduc\* OR intervention\* OR program\* OR diet\* OR  
 nutrition\* OR nutritive OR eating OR intake OR food\* OR feeding OR meal\* OR appetite OR  
 snack\* OR exercise\* OR sedentar\* OR kalori\* OR "physical activity" OR "physical activities" OR  
 "physical fitness" OR "physical training" OR "physical conditioning" OR "physical exertion" OR  
 "behavior change" OR "behavior changes" OR "behaviour change" OR "behaviour changes") OR  
 abstract:(prevent\* OR reduc\* OR intervention\* OR program\* OR diet\* OR nutrition\* OR nutritive  
 OR eating OR intake OR food\* OR feeding OR meal\* OR appetite OR snack\* OR exercise\* OR  
 sedentar\* OR kalori\* OR "physical activity" OR "physical activities" OR "physical fitness" OR  
 "physical training" OR "physical conditioning" OR "physical exertion" OR "behavior change" OR  
 "behavior changes" OR "behaviour change" OR "behaviour changes")) AND (title:(parent\* OR  
 maternal OR paternal OR mother\* OR father\* OR "family based" OR caregiver\* OR "care giver"  
 OR "care givers" OR carer\* OR "care provider" OR "care providers" OR guardian\*) OR  
 abstract:(parent\* OR maternal OR paternal OR mother\* OR father\* OR "family based" OR  
 caregiver OR "care giver" OR "care givers\*" OR carer\* OR "care provider" OR "care providers" OR  
 guardian\*)))))
