# Supplementary material for: Parent Involvement in Diet or Physical Activity Interventions to Treat or Prevent Childhood Obesity: An Umbrella Review
Source: MDPI journal article supplement (doi:10.3390/nu13093227), 2021-09-16
Supplement: s1 [file s1]

Supplementary Table S3. Primary Articles Included for each Systematic Review and/or Meta-Analysis

|                             | Number of<br>times cited | Ewald | Jang | Loveman | McLean | Mead | Oude<br>Luttikhuis | Sbruzzi | Young | Gori | Laws | Nixon | Oosterhoff | Sobol-<br>Goldberg | Verjans-<br>Janssen |
|-----------------------------|--------------------------|-------|------|---------|--------|------|--------------------|---------|-------|------|------|-------|------------|--------------------|---------------------|
| <i>Adams 2008</i>           | 1                        |       |      |         |        |      |                    |         |       |      |      | X     |            |                    |                     |
| <i>Ahamed 2007</i>          | 1                        |       |      |         |        |      |                    |         |       |      |      |       | X          |                    |                     |
| <i>Alexander 2014</i>       | 1                        |       |      |         |        |      |                    |         |       |      |      |       |            |                    | X                   |
| <i>Alexandrov 1992</i>      | 1                        |       |      |         |        |      |                    |         |       |      |      |       | X          |                    |                     |
| <i>Amaro 2006</i>           | 1                        |       |      |         |        |      |                    |         |       |      |      |       | X          |                    |                     |
| <i>Angelopoulos 2009</i>    | 2                        |       |      |         |        |      |                    |         |       |      |      |       | X          |                    | X                   |
| <i>Annesi 2013</i>          | 1                        |       |      |         |        |      |                    |         |       |      |      |       | X          |                    |                     |
| <i>Aragona 1975</i>         | 1                        |       |      | X       |        |      |                    |         |       |      |      |       |            |                    |                     |
| <i>Arauz Boudreau 2013</i>  | 1                        |       |      |         |        | X    |                    |         |       |      |      |       |            |                    |                     |
| <i>Armeno 2011</i>          | 1                        |       |      |         |        |      |                    |         |       | X    |      |       |            |                    |                     |
| <i>Bacardi-Gascon 2012</i>  | 1                        |       |      |         |        |      |                    |         |       |      |      |       |            |                    | X                   |
| <i>Baranowski 2003</i>      | 1                        |       |      |         |        |      |                    |         |       | X    |      |       |            |                    |                     |
| <i>Barbeau 2007</i>         | 1                        |       |      |         |        |      |                    |         |       |      |      |       | X          |                    |                     |
| <i>Bayer 2009</i>           | 1                        |       |      |         |        |      |                    |         |       |      |      | X     |            |                    |                     |
| <i>Beech 2003</i>           | 2                        |       |      |         |        |      |                    |         | X     | X    |      |       |            |                    |                     |
| <i>Bocca 2013</i>           | 1                        |       |      |         |        |      |                    |         |       | X    |      |       |            |                    |                     |
| <i>Boutelle 2011</i>        | 2                        | X     |      | X       |        |      |                    |         |       |      |      |       |            |                    |                     |
| <i>Boutelle 2014</i>        | 1                        |       |      |         |        | X    |                    |         |       |      |      |       |            |                    |                     |
| <i>Boutelle NCT01197443</i> | 1                        | X     |      |         |        |      |                    |         |       |      |      |       |            |                    |                     |
| <i>Brandstetter 2012</i>    | 1                        |       |      |         |        |      |                    |         |       |      |      |       | X          |                    |                     |
| <i>Bryant 2011</i>          | 1                        |       |      |         |        | X    |                    |         |       |      |      |       |            |                    |                     |
| <i>Burke 1998</i>           | 1                        |       |      |         |        |      |                    |         |       |      |      |       | X          |                    |                     |
| <i>Bush 1989</i>            | 1                        |       |      |         |        |      |                    |         |       |      |      |       | X          |                    |                     |
| <i>Caballero 2003</i>       | 1                        |       |      |         |        |      |                    |         |       |      |      |       | X          |                    |                     |
| <i>Cao 2015</i>             | 1                        |       |      |         |        |      |                    |         |       |      |      |       |            |                    | X                   |
| <i>Carrel 2005</i>          | 1                        |       |      |         |        |      |                    |         |       |      |      |       | X          |                    |                     |
| <i>Centis 2012</i>          | 1                        |       |      |         |        |      |                    |         |       |      |      |       |            |                    | X                   |
| <i>Chan 2012</i>            | 1                        |       |      |         |        |      |                    |         |       |      |      |       | X          |                    |                     |
| <i>Chomitz 2010</i>         | 1                        |       |      |         |        |      |                    |         |       |      |      |       |            |                    | X                   |
| <i>Collins 2011</i>         | 2                        | X     |      | X       |        |      |                    |         |       |      |      |       |            |                    |                     |
| <i>Coppins 2011</i>         | 1                        |       |      |         |        | X    |                    |         |       |      |      |       |            |                    |                     |
| <i>Crespo 2012</i>          | 2                        |       |      |         |        |      |                    |         |       |      |      |       | X          |                    | X                   |
| <i>Croker 2011</i>          | 2                        |       |      |         |        |      |                    | X       |       | X    |      |       |            |                    |                     |

[illegible]

|                           |   |   |   |   |   |   |   |   |  |   |  |   |   |  |   |
|---------------------------|---|---|---|---|---|---|---|---|--|---|--|---|---|--|---|
| <i>Foster 2010</i>        | 1 |   |   |   |   |   |   |   |  |   |  |   | X |  |   |
| <i>Gentile 2009</i>       | 2 |   |   |   |   |   |   |   |  | X |  |   | X |  |   |
| <i>Gillis 2007</i>        | 1 |   |   |   |   | X |   |   |  |   |  |   |   |  |   |
| <i>Golan 1998a</i>        | 1 | X |   |   |   |   |   |   |  |   |  |   |   |  |   |
| <i>Golan 1998b</i>        | 1 | X |   |   |   |   |   |   |  |   |  |   |   |  |   |
| <i>Golan 2004</i>         | 1 | X |   |   |   |   |   |   |  |   |  |   |   |  |   |
| <i>Golan 2006</i>         | 3 | X |   | X |   |   | X |   |  |   |  |   |   |  |   |
| <i>Golley 2007</i>        | 3 |   |   | X |   |   | X | X |  |   |  |   |   |  |   |
| <i>Graf 2006</i>          | 1 |   |   |   |   |   |   |   |  |   |  |   | X |  |   |
| <i>Graf 2008</i>          | 1 |   |   |   |   |   |   |   |  |   |  |   | X |  |   |
| <i>Graham 2008</i>        | 1 |   |   |   |   |   |   |   |  |   |  | X |   |  |   |
| <i>Graves 1988</i>        | 1 |   |   |   |   |   |   | X |  |   |  |   |   |  |   |
| <i>Grydeland 2014</i>     | 1 |   |   |   |   |   |   |   |  |   |  |   | X |  |   |
| <i>Gunnarsdottir 2011</i> | 1 |   |   |   |   | X |   |   |  |   |  |   |   |  |   |
| <i>Haire-Joshu 2010</i>   | 1 |   |   |   |   |   |   |   |  | X |  |   |   |  |   |
| <i>Hansen 1991</i>        | 1 |   |   |   |   |   |   |   |  |   |  |   | X |  |   |
| <i>Harrell 1999</i>       | 1 |   |   |   |   |   |   |   |  |   |  |   | X |  |   |
| <i>Harrison 2006</i>      | 1 |   |   |   |   |   |   |   |  |   |  |   | X |  |   |
| <i>Henaghan 2008</i>      | 1 |   |   |   |   |   |   |   |  |   |  |   | X |  |   |
| <i>Hills 1988</i>         | 1 |   |   |   |   |   |   | X |  |   |  |   |   |  |   |
| <i>Ho 2016</i>            | 1 |   |   |   |   | X |   |   |  |   |  |   |   |  |   |
| <i>Hoffman 2011</i>       | 1 |   |   |   |   |   |   |   |  |   |  |   | X |  |   |
| <i>Hopper 2005</i>        | 1 |   |   |   |   |   |   |   |  |   |  |   | X |  |   |
| <i>Hu 2010</i>            | 1 |   |   |   |   |   |   |   |  |   |  | X |   |  |   |
| <i>Hughes 2008</i>        | 1 |   |   |   |   |   | X |   |  |   |  |   |   |  |   |
| <i>Israel 1984</i>        | 1 |   |   |   |   |   |   | X |  |   |  |   |   |  |   |
| <i>Israel 1985</i>        | 2 |   |   |   | X |   |   | X |  |   |  |   |   |  |   |
| <i>Israel 1986</i>        | 1 |   |   |   |   |   |   | X |  |   |  |   |   |  |   |
| <i>Israel 1990</i>        | 1 |   |   |   |   |   |   | X |  |   |  |   |   |  |   |
| <i>Israel 1994</i>        | 1 |   |   |   | X |   |   |   |  |   |  |   |   |  |   |
| <i>James 2004</i>         | 1 |   |   |   |   |   |   |   |  |   |  |   | X |  |   |
| <i>Janicke 2008</i>       | 2 | X |   | X |   |   |   |   |  |   |  |   |   |  |   |
| <i>Janicke 2009</i>       | 1 | X |   |   |   |   |   |   |  |   |  |   |   |  |   |
| <i>Janicke 2011</i>       | 1 | X |   |   |   |   |   |   |  |   |  |   |   |  |   |
| <i>Jansen 2011</i>        | 3 |   | X | X |   |   |   |   |  |   |  |   | X |  |   |
| <i>Jiang 2007</i>         | 2 |   |   |   |   |   |   |   |  |   |  |   | X |  | X |
| <i>Johnston 2013</i>      | 1 |   |   |   |   |   |   |   |  |   |  |   | X |  |   |
| <i>Jouret 2009</i>        | 2 |   |   |   |   |   |   |   |  | X |  |   | X |  |   |
| <i>Kain 2004</i>          | 1 |   |   |   |   |   |   |   |  |   |  |   |   |  | X |
| <i>Kalarchian 2009</i>    | 2 |   |   |   |   | X |   | X |  |   |  |   |   |  |   |

[illegible]

|                               |   |  |   |   |  |   |  |   |   |   |  |   |   |  |   |
|-------------------------------|---|--|---|---|--|---|--|---|---|---|--|---|---|--|---|
| <i>Plachta-Danielzik 2011</i> | 1 |  |   |   |  |   |  |   |   |   |  |   | X |  |   |
| <i>Rausch Hersovici 2013</i>  | 1 |  |   |   |  |   |  |   |   |   |  |   | X |  |   |
| <i>Raynor 2012a</i>           | 1 |  |   | X |  |   |  |   |   |   |  |   |   |  |   |
| <i>Raynor 2012b</i>           | 1 |  |   | X |  |   |  |   |   |   |  |   |   |  |   |
| <i>Reed 2008</i>              | 1 |  |   |   |  |   |  |   |   |   |  |   | X |  |   |
| <i>Reilly 2006</i>            | 2 |  |   |   |  |   |  |   |   |   |  | X | X |  |   |
| <i>Reinehr 2010</i>           | 1 |  |   |   |  | X |  |   |   |   |  |   |   |  |   |
| <i>Resnick 2009</i>           | 1 |  |   | X |  |   |  |   |   |   |  |   |   |  |   |
| <i>Resnicow 2015</i>          | 1 |  |   | X |  |   |  |   |   |   |  |   |   |  |   |
| <i>Robinson 1999</i>          | 1 |  |   |   |  |   |  |   |   |   |  |   | X |  |   |
| <i>Robinson 2003</i>          | 1 |  |   |   |  |   |  |   | X |   |  |   |   |  |   |
| <i>Rodearmel 2007</i>         | 1 |  |   |   |  | X |  |   |   |   |  |   |   |  |   |
| <i>Rosario 2013</i>           | 1 |  |   |   |  |   |  |   |   |   |  |   | X |  |   |
| <i>Sacchetti 2013</i>         | 1 |  |   |   |  |   |  |   |   |   |  |   | X |  |   |
| <i>Sacher 2010</i>            | 3 |  |   |   |  | X |  | X |   | X |  |   |   |  |   |
| <i>Saelens 2013</i>           | 1 |  |   |   |  | X |  |   |   |   |  |   |   |  |   |
| <i>Sahota 2001</i>            | 1 |  |   |   |  |   |  |   |   |   |  |   | X |  |   |
| <i>Salcedo Aguilar 2010</i>   | 1 |  |   |   |  |   |  |   |   |   |  |   | X |  |   |
| <i>Sallis 1993</i>            | 1 |  |   |   |  |   |  |   |   |   |  |   | X |  |   |
| <i>Salmon 2008</i>            | 1 |  |   |   |  |   |  |   |   |   |  |   | X |  |   |
| <i>Sanigorski 2008</i>        | 2 |  |   |   |  |   |  |   | X |   |  |   |   |  | X |
| <i>Senediak 1985</i>          | 1 |  |   |   |  |   |  |   | X |   |  |   |   |  |   |
| <i>Serra-Paya 2015</i>        | 1 |  |   |   |  | X |  |   |   |   |  |   |   |  |   |
| <i>Shelton 2007</i>           | 1 |  | X |   |  |   |  |   |   |   |  |   |   |  |   |
| <i>Sichieri 2009</i>          | 1 |  |   |   |  |   |  |   |   |   |  |   | X |  |   |
| <i>Siegrist 2013</i>          | 2 |  |   |   |  |   |  |   |   |   |  |   | X |  | X |
| <i>Simon 2008</i>             | 1 |  |   |   |  |   |  |   |   |   |  |   | X |  |   |
| <i>Siwik 2013</i>             | 1 |  |   |   |  | X |  |   |   |   |  |   |   |  |   |
| <i>Small 2013</i>             | 1 |  |   | X |  |   |  |   |   |   |  |   |   |  |   |
| <i>Spiegel 2006</i>           | 1 |  |   |   |  |   |  |   |   |   |  |   | X |  |   |
| <i>Stock 2007</i>             | 2 |  |   |   |  |   |  |   |   |   |  | X | X |  |   |
| <i>Story 2003</i>             | 2 |  |   |   |  |   |  |   |   | X |  |   | X |  |   |
| <i>Story 2012</i>             | 1 |  |   |   |  |   |  |   |   |   |  |   | X |  |   |
| <i>Tarro 2014</i>             | 1 |  |   |   |  |   |  |   |   | X |  |   |   |  |   |
| <i>Taylor 2007</i>            | 1 |  |   |   |  |   |  |   |   |   |  |   | X |  |   |
| <i>Taylor 2015</i>            | 1 |  |   |   |  | X |  |   |   |   |  |   |   |  |   |
| <i>Thivel 2011</i>            | 1 |  |   |   |  |   |  |   |   |   |  |   | X |  |   |
| <i>Toruner 2010</i>           | 1 |  |   |   |  |   |  |   |   |   |  |   | X |  |   |
| <i>Treu 2015</i>              | 1 |  |   |   |  |   |  |   |   |   |  |   |   |  | X |
| <i>Trost 2014</i>             | 1 |  |   |   |  |   |  |   |   | X |  |   |   |  |   |

|                          |             |           |          |           |           |           |          |          |           |           |          |           |           |           |           |
|--------------------------|-------------|-----------|----------|-----------|-----------|-----------|----------|----------|-----------|-----------|----------|-----------|-----------|-----------|-----------|
| <i>Van Grieken 2013</i>  | 1           |           |          | X         |           |           |          |          |           |           |          |           |           |           |           |
| <i>VanDongen 1995</i>    | 1           |           |          |           |           |           |          |          |           |           |          |           | X         |           |           |
| <i>Wafa 2011</i>         | 2           |           |          |           |           | X         |          | X        |           |           |          |           |           |           |           |
| <i>Wake 2009</i>         | 1           |           |          |           |           | X         |          |          |           |           |          |           |           |           |           |
| <i>Wake 2013</i>         | 1           |           |          |           |           | X         |          |          |           |           |          |           |           |           |           |
| <i>Waling 2010</i>       | 1           |           |          |           |           |           |          | X        |           |           |          |           |           |           |           |
| <i>Walling 2012</i>      | 1           |           |          |           |           | X         |          |          |           |           |          |           |           |           |           |
| <i>Walter 1985</i>       | 1           |           |          |           |           |           |          |          |           |           |          |           | X         |           |           |
| <i>Walther 2009</i>      | 1           |           |          |           |           |           |          |          |           |           |          |           | X         |           |           |
| <i>Warren 2003</i>       | 1           |           |          |           |           |           |          |          |           |           |          | X         |           |           |           |
| <i>Warschburger 2016</i> | 1           |           |          |           |           | X         |          |          |           |           |          |           |           |           |           |
| <i>Waters 2018</i>       | 1           |           |          |           |           |           |          |          |           |           |          |           |           |           | X         |
| <i>Weigel 2008</i>       | 1           |           |          |           |           | X         |          |          |           |           |          |           |           |           |           |
| <i>Weintraub 2008</i>    | 1           |           |          |           |           | X         |          |          |           |           |          |           |           |           |           |
| <i>West 2010</i>         | 2           |           | X        | X         |           |           |          |          |           |           |          |           |           |           |           |
| <i>Willi 2012</i>        | 1           |           |          |           |           |           |          |          |           |           |          |           | X         |           |           |
| <i>Williamson 2012</i>   | 2           |           |          |           |           |           |          |          |           | X         |          |           | X         |           |           |
| <i>Winter 2013</i>       | 1           |           |          |           |           |           |          |          |           |           | X        |           |           |           |           |
| <i>Wright 2013</i>       | 1           |           |          |           |           |           |          |          |           | X         |          |           |           |           |           |
| <i>Xu 2015</i>           | 1           |           |          |           |           |           |          |          |           |           |          |           |           |           | X         |
| <i>Xu 2017</i>           | 1           |           |          |           |           |           |          |          |           |           |          |           |           |           | X         |
| <i>Yin 2005</i>          | 1           |           |          |           |           |           |          |          |           |           |          |           | X         |           |           |
| <i>Yin 2012</i>          | 1           |           |          |           |           |           |          |          |           |           |          |           | X         |           |           |
|                          | <b>1.23</b> | <b>12</b> | <b>8</b> | <b>20</b> | <b>11</b> | <b>38</b> | <b>8</b> | <b>8</b> | <b>16</b> | <b>18</b> | <b>7</b> | <b>12</b> | <b>89</b> | <b>8*</b> | <b>18</b> |

\*Eight studies are described/summarized in the publication, but the identity of the eight studies could not be ascertained.
