# Supplementary material for: Parent Involvement in Diet or Physical Activity Interventions to Treat or Prevent Childhood Obesity: An Umbrella Review
Source: MDPI journal article supplement (doi:10.3390/nu13093227), 2021-09-16
Supplement: s1 [file s1]

Supplementary Table S2. Articles Excluded after Full Text Review and Reasons for Exclusion

|    | <b>Author, Publication Year</b> | <b>Reason(s) for Exclusion</b>                                    |
|----|---------------------------------|-------------------------------------------------------------------|
| 1  | Agaronov, 2018                  | BMI not an outcome measure                                        |
| 2  | AlMarzooqi, 2011                | Not a systematic review                                           |
| 3  | Altman, 2015                    | Not a systematic review                                           |
| 4  | Antwi, 2013                     | Age out of range                                                  |
| 5  | Ash, 2017                       | Age out of range                                                  |
| 6  | Azabedo 2016                    | No parental component                                             |
| 7  | Barnes, 2018                    | Age out of range                                                  |
| 8  | Barr-Anderson, 2013             | Age out of range                                                  |
| 9  | Bates 2018                      | Associations only (no interventions)                              |
| 10 | Berge, 2011                     | Age out of range                                                  |
| 11 | Berry, 2004                     | Age out of range, Not a systematic review                         |
| 12 | Black, 2017                     | Age out of range, No parental component, Missing outcome criteria |
| 13 | Bond, 2009                      | Age out of range                                                  |
| 14 | Bond, 2011                      | Age out of range                                                  |
| 15 | Bonilla, 2017                   | Article in Spanish                                                |
| 16 | Borrelli, 2015                  | Age out of range                                                  |
| 17 | Branscum, 2011                  | Age out of range                                                  |
| 18 | Brigden, 2019                   | BMI not an outcome measure, Missing outcome criteria              |
| 19 | Brown, 2019                     | No parental component                                             |
| 20 | Brunton, 2003                   | Age out of range                                                  |
| 21 | Burchett, 2018                  | Age out of range                                                  |
| 22 | Campbell, 2007                  | Age out of range                                                  |
| 23 | Collins, 2013                   | Age out of range                                                  |
| 24 | Colquitt, 2016                  | Age out of range                                                  |
| 25 | D'Onise, 2010                   | Age out of range                                                  |
| 26 | Dabas, 2018                     | Not a systematic review                                           |
| 27 | De Niet, 2011                   | Not a systematic review                                           |
| 28 | Dellert, 2014                   | Age out of range                                                  |
| 29 | Durbin, 2018                    | Age out of range                                                  |
| 30 | Edmunds, 2004                   | Not a systematic review, Could not be found                       |
| 31 | Ells, 2018                      | Not a systematic review (umbrella review)                         |
| 32 | Foster, 2015                    | Age out of range                                                  |
| 33 | Gao, 2008                       | Age out of range                                                  |
| 34 | Gerards, 2011                   | Age out of range                                                  |
| 35 | Golley, 2011                    | Age out of range                                                  |
| 36 | Guerra, 2016                    | Not a systematic review                                           |
| 37 | Hamel, 2011                     | Age out of range                                                  |
| 38 | Hammersley, 2016                | Age out of range                                                  |
| 39 | Hartman, 2011                   | Age out of range                                                  |
| 40 | Hesketh, 2010                   | Age out of range, BMI not an outcome measure                      |
| 41 | Hesketh, 2017                   | Age out of range                                                  |
| 42 | Hingle, 2010                    | Age out of range                                                  |

|    |                     |                                                     |
|----|---------------------|-----------------------------------------------------|
| 43 | Ho, 2012            | Age out of range                                    |
| 44 | Ickes, 2014         | Age out of range                                    |
| 45 | Inella, 2020        | Age out of range                                    |
| 46 | Jalali, 2016        | Age out of range                                    |
| 47 | Janicke, 2014       | Age out of range                                    |
| 48 | Jull, 2013          | Age out of range                                    |
| 49 | Kader, 2015         | Age out of range                                    |
| 50 | Kattemannk, 2011    | Not a systematic review                             |
| 51 | Katz, 2008          | Age out of range                                    |
| 52 | Kelishadi, 2014     | Age out of range                                    |
| 53 | Kim, 2019           | Age out of range                                    |
| 54 | Kitzmann, 2011      | Not a systematic review                             |
| 55 | Knowlden, 2012      | Age out of range                                    |
| 56 | Kornet, 2017        | Age out of range                                    |
| 57 | Kothandan, 2014     | Age out of range                                    |
| 58 | Kuhl, 2012          | BMI not an outcome measure, Not a systematic review |
| 59 | Larson, 2011        | Age out of range                                    |
| 60 | Lee, 2016           | No placebo group described                          |
| 61 | Lindsay, 2006       | Not a systematic review                             |
| 62 | Ling, 2016          | Age out of range, Missing outcome criteria          |
| 63 | Ling, 2017          | Age out of range                                    |
| 64 | Lobelo, 2013        | Age out of range                                    |
| 65 | Luybli, 2019        | Not a systematic review                             |
| 66 | Masoumi, 2017       | Not a systematic review                             |
| 67 | McCambridge, 2006   | BMI not an outcome measure, Not a systematic review |
| 68 | Mehdizadeh, 2020    | Age out of range                                    |
| 69 | Meiklejohn, 2016    | Age out of range                                    |
| 70 | Melnyk, 2005        | Not a systematic review                             |
| 71 | Mikkelsen, 2014     | BMI not an outcome measure in all studies           |
| 72 | Monasta, 2011       | Age out of range                                    |
| 73 | Morris, 2015        | Age out of range                                    |
| 74 | Nga, 2019           | Not a systematic review                             |
| 75 | Niemeier, 2012      | Age out of range                                    |
| 76 | Pamungkas, 2019     | Age not reported                                    |
| 77 | Perez-Morales, 2009 | Article in Spanish                                  |
| 78 | Raber, 2016         | Age out of range                                    |
| 79 | Rajjo, 2017         | Not a systematic review                             |
| 80 | Reed, 2015          | Age out of range, Not a systematic review           |
| 81 | Rodriquez, 2014     | Article in Spanish                                  |
| 82 | Russell, 2016       | Age out of range                                    |
| 83 | Saguil, 2012        | Age out of range, Not a systematic review           |
| 84 | Schlechter, 2016    | Age not reported, BMI not an outcome measure        |
| 85 | Seo, 2010           | Age out of range                                    |
| 86 | Sharma, 2007        | Age out of range                                    |
| 87 | Shirley, 2015       | Age out of range, Not a systematic review           |

|     |                        |                                                      |
|-----|------------------------|------------------------------------------------------|
| 88  | Showell, 2013          | Age out of range                                     |
| 89  | Silveira, 2011         | Age out of range                                     |
| 90  | Skouteris, 2011a       | Age out of range                                     |
| 91  | Skouteris, 2011b       | Conference Abstract                                  |
| 92  | Skouteris, 2012        | Age out of range                                     |
| 93  | Small, 2013            | Missing outcome criteria, No placebo group described |
| 94  | Snuggs, 2019           | Age out of range                                     |
| 95  | Spinola e Castro, 2014 | Not a systematic review                              |
| 96  | Sreevatsava, 2013      | Age out of range                                     |
| 97  | Stacey, 2017           | Not a systematic review                              |
| 98  | Steyn, 2009            | Age out of range                                     |
| 99  | Stice, 2006            | Age out of range                                     |
| 100 | Sung-Chan, 2013        | Age out of range                                     |
| 101 | Swanson, 2011          | Age out of range                                     |
| 102 | Thury, 2015            | Not a systematic review                              |
| 103 | Upton, 2014            | Age out of range                                     |
| 104 | Van de Kolk, 2019      | Age out of range                                     |
| 105 | Van der Kruk, 2013     | Age out of range                                     |
| 106 | Van Lippevelde, 2012   | Age out of range                                     |
| 107 | Vasques, 2014          | Age out of range                                     |
| 108 | Ventura, 2008          | Age not reported, Not a systematic review            |
| 109 | Ward, 2017             | Age out of range                                     |
| 110 | Waters, 2011           | Age out of range                                     |
| 111 | Wilson, 2014           | Not a systematic review                              |
| 112 | Wofford, 2008          | Age out of range, Not a systematic review            |
| 113 | Yavuz, 2015            | Age out of range, Not a systematic review            |
| 114 | Young, 2018            | Age out of range, Missing outcome criteria           |
| 115 | Zenzen, 2009           | Age out of range, Not a systematic review            |
